# Supplementary material
Source: PubMed Central journal article supplement (PMC3262082)
Supplement: NIHMS344668-supplement-Supp_Fig_S1-S3.pdf [file NIHMS344668-supplement-Supp_Fig_S1-S3.pdf]

# Supplemental Figure 1

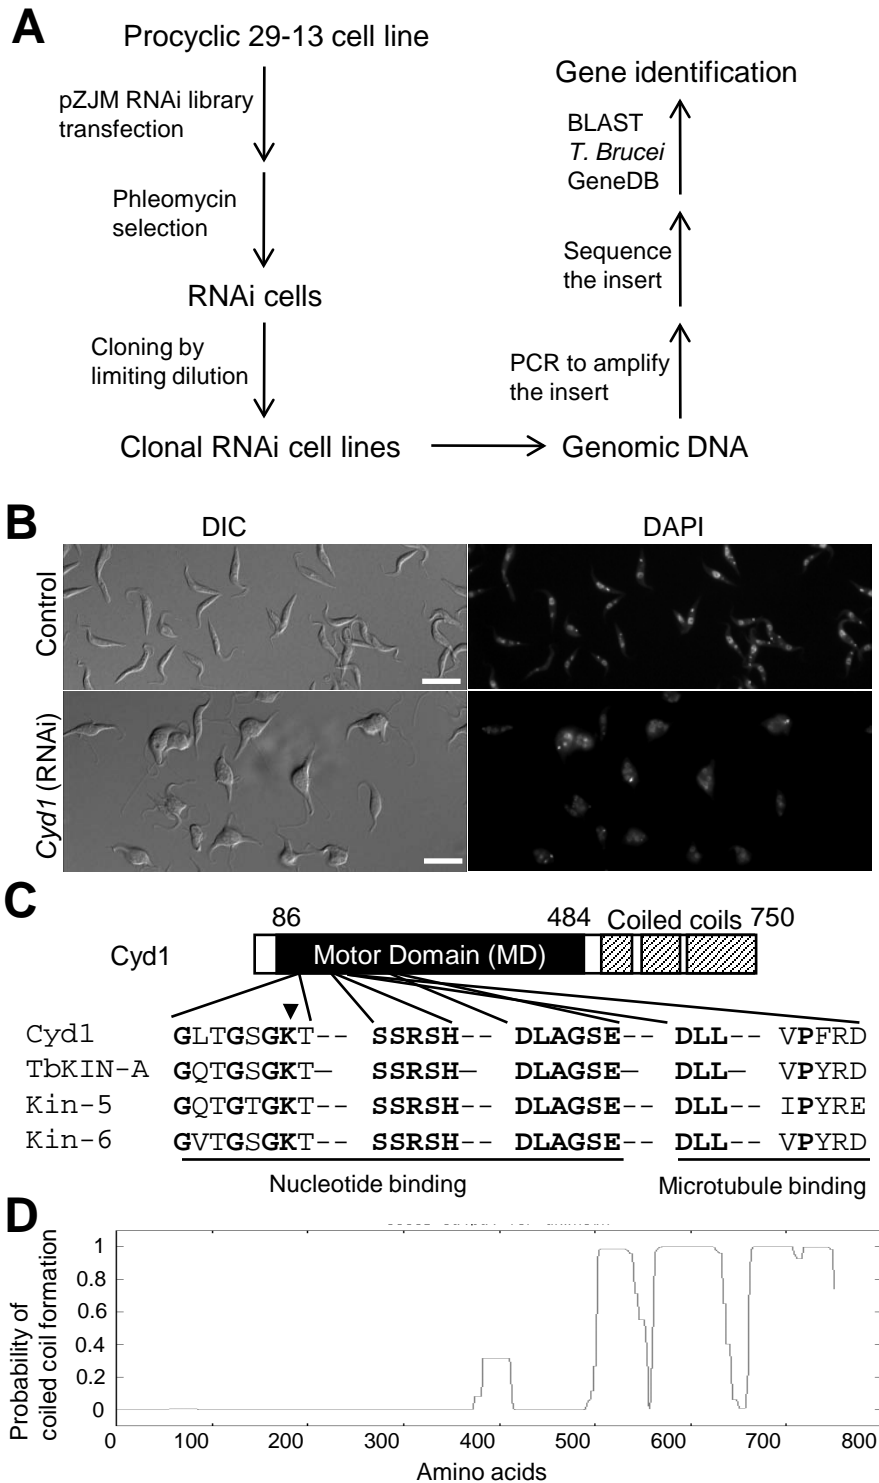

**Supplemental Figure 1. Identification of *TbKIN-C* gene.** (A). Strategy for identification of cytokinesis defect genes by genomic RNAi screen in the procyclic form of *T. brucei*. (B). Phenotypes of the *TbKIN-C* mutant identified by RNAi screen. Bars: 10  $\mu$ m. (C). Schematic representation of the structure of *TbKIN-C*. Alignment of the conserved motifs in the motor domain of *TbKIN-C* with that of trypanosome *TbKIN-A*, and human *Kin-5* and *Kin-6* kinesins is presented. Black arrowhead pointed to the conserved lysine residue that is essential for ATP binding and is mutated to alanine in *TbKIN-C* (K196A) for *in vitro* ATPase assays. (D). Location of the coiled-coil motifs at the C-terminus of *TbKIN-C* as predicted by the COILS program.

# Supplemental Figure 2

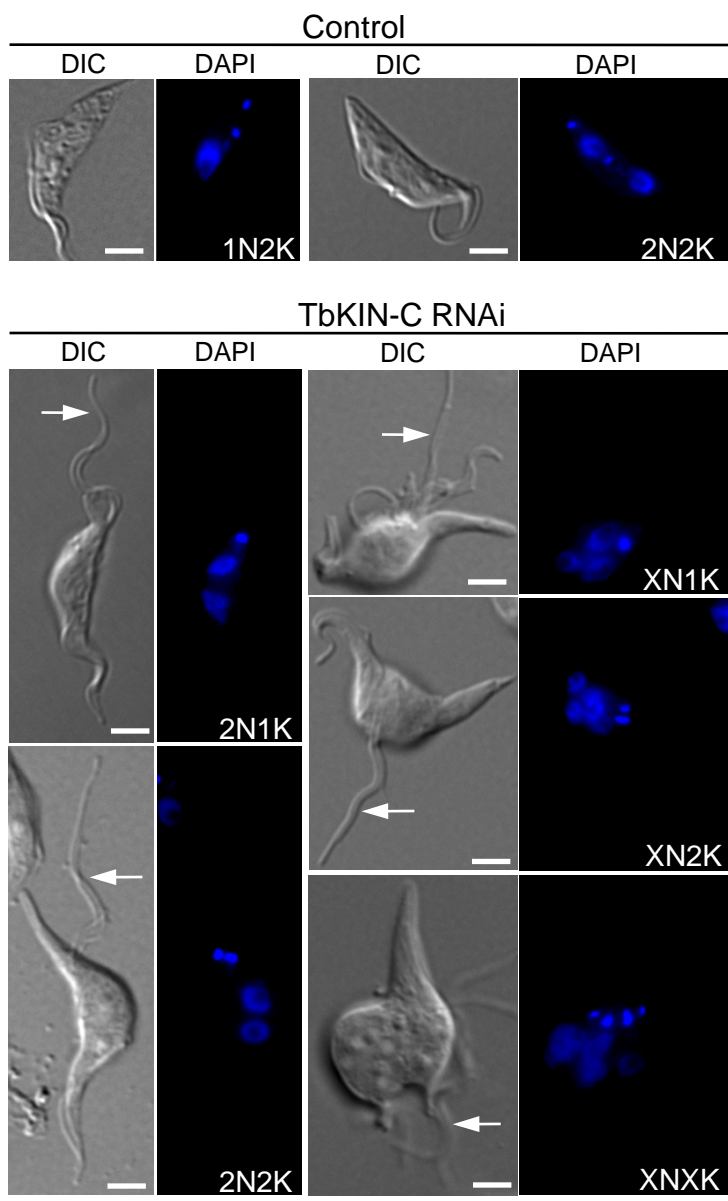

**Supplemental Figure 2. Morphology of TbKIN-C RNAi cells.** Cells were fixed with paraformaldehyde and stained with DAPI for nuclear and kinetoplast DNA. The arrows pointed to detached flagellum. Bars: 2  $\mu$ m.

# Supplemental Figure 3

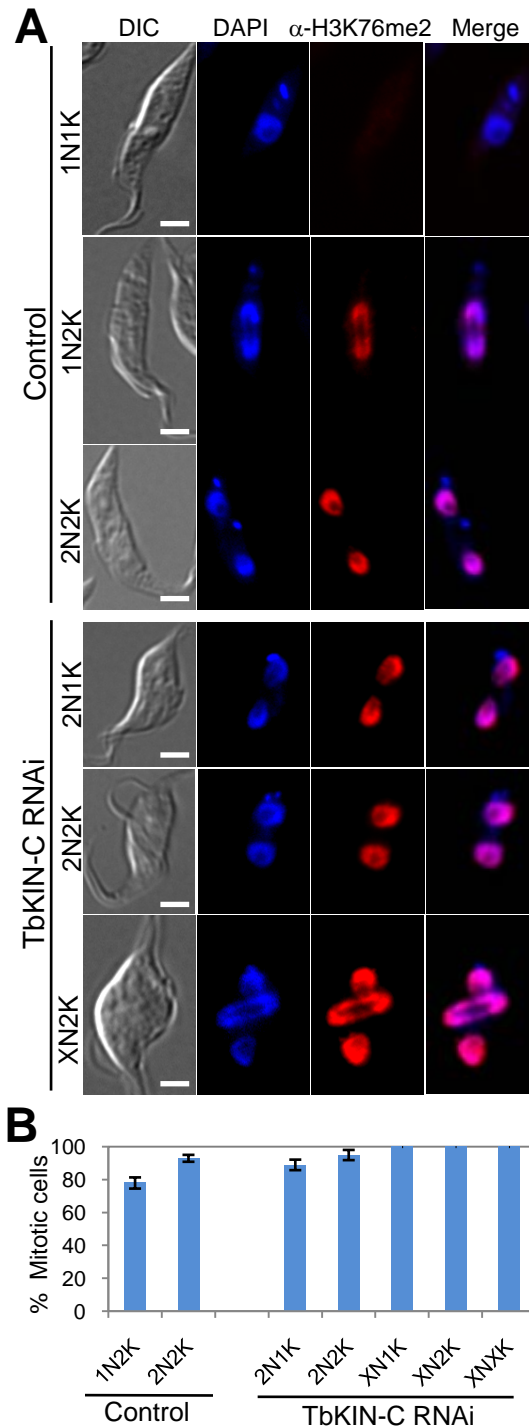

**Supplemental Figure 3. RNAi of TbKIN-C does not inhibit mitotic progression in the procyclic form of *T. brucei*.** (A). Effect of TbKIN-C RNAi on mitotic progression in the procyclic form of *T. brucei*. Control and TbKIN-C RNAi cells were fixed and stained with anti-H3K76me2 antibody, a mitotic marker in trypanosomes. Bars: 2  $\mu$ m. (B). Percentage of mitotic cells in control and TbKIN-C RNAi cells as determined by anti-H3K76me2 antibody staining. Data are presented as the mean percent  $\pm$ S.D. of  $\sim$ 200 cells counted from three independent experiments.
